# Supplementary material for: Photothermal and adsorption effects of silver selenide nanoparticles modified by different surfactants in nursing care of cancer patients
Source: PubMed Central journal article supplement (PMC7476516; doi:10.1080/14686996.2020.1800367), 2020-09-01
Supplement: TSTA_A_1800367_SM7215.pdf [file TSTA_A_1800367_SM7215.pdf]

---

## Supporting Information

# **Photothermal and adsorption effects of silver selenide nanoparticles modified by different surfactants in nursing care of cancer patients**

Xingju Yang<sup>1,†</sup>, Chen Wang<sup>2,†</sup>, Xiaoxu Zhang<sup>4</sup>, Yue Wang<sup>4</sup>, Feng Gao<sup>5</sup>, Lixia Sun<sup>1</sup>,

Wenli Xu<sup>4</sup>, Changxiu Qiao<sup>3,\*</sup>, Guiqin Zhang<sup>1,\*</sup>

<sup>1</sup> Department of nursing, Jinan people's Hospital Affiliated to Shandong First Medical University, Jinan 271199, China. Email: [guiqinzhang12@163.com](mailto:guiqinzhang12@163.com)

<sup>2</sup> Neurointerventional Department, the First Affiliated Hospital of Zhengzhou University, Zhengzhou, 450052, China.

<sup>3</sup> Nursing School of Binzhou Medical University, Binzhou, 256603, China. Email: [cxqiao2662@163.com](mailto:cxqiao2662@163.com)

<sup>4</sup> The Intensive Care Unit (ICU), Jinan people's Hospital Affiliated to Shandong First Medical University, Jinan 271199, China

<sup>5</sup> Tumor Department, Jinan people's Hospital Affiliated to Shandong First Medical University, Jinan 271199, China

X. Yang<sup>†</sup> and C. Wang<sup>†</sup> equally contributed to this work.

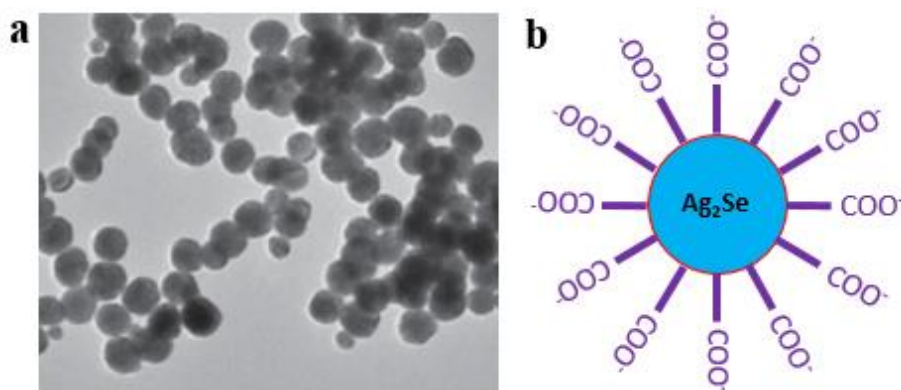

**Fig. S1.** TEM image (a) and Schematic diagram (b) of SDBS-Ag<sub>2</sub>Se nanoparticles.

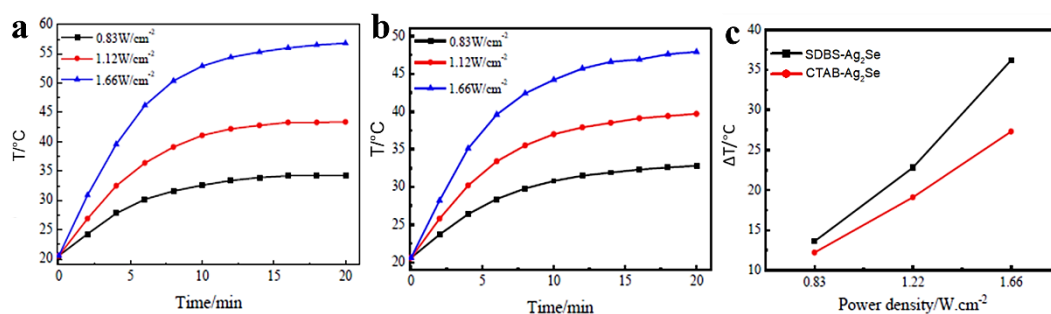

**Fig. S2.** NIR-induced heat generation of SDBS-Ag<sub>2</sub>Se (a) and CTAB-Ag<sub>2</sub>Se (b) suspensions irradiated with different power densities. (c) NIR-induced temperature difference of SDBS-Ag<sub>2</sub>Se and CTAB-Ag<sub>2</sub>Se irradiated with different power densities.

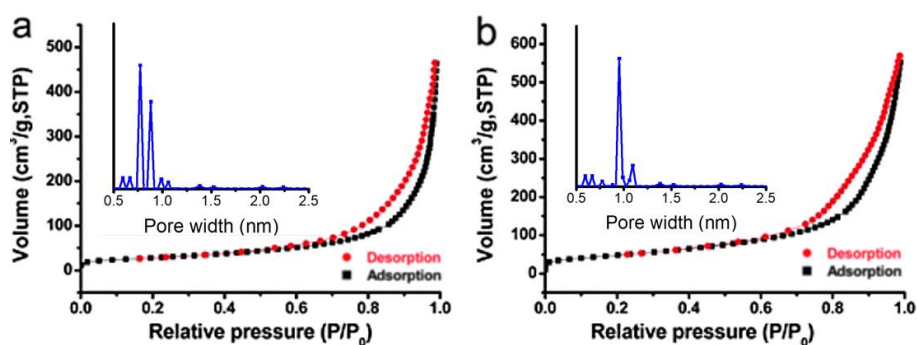

**Fig. S3.** N<sub>2</sub> adsorption-desorption isotherms of SDBS-Ag<sub>2</sub>Se (a) and CTAB-Ag<sub>2</sub>Se (b).
